# Supplementary material for: The EMBL-EBI Job Dispatcher sequence analysis tools framework in 2024
Source: PubMed Central journal article supplement (PMC11223882; doi:10.1093/nar/gkae241), 2024-04-10
Supplement: gkae241_supplemental_file.pdf [file gkae241_supplemental_file.pdf]

**Supplementary Table 1** - Bioinformatics applications available through JD in 2024.

| Category                                                                                                                          | Tools                                                                                                                                                                                        |
|-----------------------------------------------------------------------------------------------------------------------------------|----------------------------------------------------------------------------------------------------------------------------------------------------------------------------------------------|
| Multiple Sequence Alignment<br>( <a href="https://www.ebi.ac.uk/jdispatcher/msa/">https://www.ebi.ac.uk/jdispatcher/msa/</a> )    | Clustal Omega, Kalign, MAFFT, MUSCLE, T-Coffee, MView, WebPrank                                                                                                                              |
| Pairwise Sequence Alignment<br>( <a href="https://www.ebi.ac.uk/jdispatcher/psa/">https://www.ebi.ac.uk/jdispatcher/psa/</a> )    | Needle, Stretcher, Water, Matcher, LALIGN, GeneWise, GGSEARCH2SEQ, SSEARCH2SEQ                                                                                                               |
| Phylogeny Analysis<br>( <a href="https://www.ebi.ac.uk/jdispatcher/phylogeny/">https://www.ebi.ac.uk/jdispatcher/phylogeny/</a> ) | Simple Phylogeny (ClustalW2)                                                                                                                                                                 |
| Protein Functional Analysis<br>( <a href="https://www.ebi.ac.uk/jdispatcher/pfa/">https://www.ebi.ac.uk/jdispatcher/pfa/</a> )    | InterProScan 5, PfamScan, Phobius, Pratt, RADAR, HMMER3 phmmer, HMMER3 hmmscan                                                                                                               |
| RNA Analysis<br>( <a href="https://www.ebi.ac.uk/jdispatcher/rna/">https://www.ebi.ac.uk/jdispatcher/rna/</a> )                   | Infernal cmscan, MapMi, R2DT                                                                                                                                                                 |
| Sequence Similarity Search<br>( <a href="https://www.ebi.ac.uk/jdispatcher/sss/">https://www.ebi.ac.uk/jdispatcher/sss/</a> )     | NCBI BLAST+, PSI-BLAST, FASTA, SSEARCH, FASTM/S/F, GGSEARCH, GLSEARCH, PSI-Search, PSI-Search2                                                                                               |
| Sequence Statistics<br>( <a href="https://www.ebi.ac.uk/jdispatcher/seqstats/">https://www.ebi.ac.uk/jdispatcher/seqstats/</a> )  | SAPS, Pepinfo, Pepstats, Pepwindow, Cpgplot, Newcpgreport, Isochore, Dotmatcher, Dottup, Dotpath, Polydot                                                                                    |
| Sequence Translation<br>( <a href="https://www.ebi.ac.uk/jdispatcher/st/">https://www.ebi.ac.uk/jdispatcher/st/</a> )             | Transeq, Sixpack, Backtranseq, Backtranambig                                                                                                                                                 |
| Sequence Format Conversion<br>( <a href="https://www.ebi.ac.uk/jdispatcher/sfc/">https://www.ebi.ac.uk/jdispatcher/sfc/</a> )     | Seqret, MView                                                                                                                                                                                |
| Sequence Operation<br>( <a href="https://www.ebi.ac.uk/jdispatcher/so/">https://www.ebi.ac.uk/jdispatcher/so/</a> )               | Seqcksum                                                                                                                                                                                     |
| EMBOSS Suite<br>( <a href="https://www.ebi.ac.uk/jdispatcher/emboss/">https://www.ebi.ac.uk/jdispatcher/emboss/</a> )             | Needle, Stretcher, Water, Matcher, Transeq, Sixpack, Backtranseq, Backtranambig, Pepinfo, Pepstats, Pepwindow, Cpgplot, Newcpgreport, Isochore, Dotmatcher, Dottup, Dotpath, Polydot, Seqret |
| Database Entry Fetch<br>( <a href="https://www.ebi.ac.uk/Tools/dbfetch/">https://www.ebi.ac.uk/Tools/dbfetch/</a> )               | Dbfetch (fetching data from 57 domains, see Supplementary Table 2)                                                                                                                           |

**Supplementary Table 2** - Sequence libraries available through JD in 2024.

| <b>Category</b>                          | <b>Data</b>                                                                                                                                                                                                                                                                                        |
|------------------------------------------|----------------------------------------------------------------------------------------------------------------------------------------------------------------------------------------------------------------------------------------------------------------------------------------------------|
| UniProtKB protein sequences              | UniProtKB, SwissProt, SwissProt Isoforms, TrEMBL, UniProtKB Taxonomic Subsets (13 subgroups, including: bacteria, archaea, eukaryota, SARS-CoV-2, etc.), Reference Proteomes, Representative Proteomes (15, 35, 55, 75), UniProt Reference (UniRef 50, 90 and 100), UniParc, UniProtKB-PDB, MGnify |
| Patent protein sequences                 | EPO, JPO, KIPO, UPSPTO                                                                                                                                                                                                                                                                             |
| Structures of protein sequences          | PDBe, AlphaFold DB                                                                                                                                                                                                                                                                                 |
| Protein families                         | Pfam, TIGRFAM, Superfamily, Gene3D, PIRSF, TreeFam, Pfam SARS-CoV-2                                                                                                                                                                                                                                |
| Other protein sequences                  | Enzyme Portal, IntAct, IPD-IMGT/HLA, IPD-KIR, IPD-MHC, MEROPS (MP, MPEP and MPRO), ChEMBL, Quest for Orthologs                                                                                                                                                                                     |
| ENA nucleotide sequences                 | ENA sequences for Coding, Non-coding, Barcode, Geospatial, Ribosomal RNA and others (10 subgroups, including: Expressed Sequence Tag, Genome Survey Sequence, etc.)                                                                                                                                |
| Ensembl Genomes sequences                | Genomes from Bacteria, Fungi, Plants, Metazoa, Protists, WormBase Parasite, SARS-CoV-2                                                                                                                                                                                                             |
| Structures of nucleotide sequences       | PDBe                                                                                                                                                                                                                                                                                               |
| Other nucleotide sequences               | IMGT/LIGM-DB, IMGT/HLA (CDS and genomic), IPD-KIR (CDS and genomic), IPD-NHKIR (CDS and genomic), IPD-MHC (CDS and genomic), UniVec                                                                                                                                                                |
| Additional entries available via Dbfetch | EMDB, PDBe-KB, MEDLINE, NCBI Taxonomy, EDAM ontology, HGNC                                                                                                                                                                                                                                         |
